# Supplementary material for: Highly Efficient Removal for Methylene Blue and Cu2+ onto UiO-66 Metal–Organic Framework/Carboxylated Graphene Oxide-Incorporated Sodium Alginate Beads
Source: PubMed Central journal article supplement — ACS Omega. 2021 Sep 3;6(36):23528–41. doi: 10.1021/acsomega.1c03479 (PMC8444308; doi:10.1021/acsomega.1c03479), 2021-09-03
Supplement: ao1c03479_si_001.pdf [file ao1c03479_si_001.pdf]

## Supporting Information

### **Highly efficient removal for methylene blue and Cu<sup>2+</sup> onto UiO-66 MOF/carboxylated graphene oxide incorporated sodium alginate beads**

Abdelazeem S. Eltaweil\*, Injy M. Mamdouh, Eman M. Abd El-Monaem, Gehan M. El-Subruti

Chemistry Department, Faculty of Science, Alexandria University, Alexandria 21321, Egypt.

\*Corresponding author: Abdelazeem S. Eltaweil (E-mail: [abdelazeemeltaweil@alexu.edu.eg](mailto:abdelazeemeltaweil@alexu.edu.eg))

**Table S1** Adsorption thermodynamic parameters of the adsorption of both MB and Cu<sup>2+</sup> onto UiO-66 /GOCOOH @SA composite beads

| <b>Pollutant</b>       | <b>Temperature (K)</b> | <b><math>\Delta G^\circ</math> (kJ/mol)</b> | <b><math>\Delta H^\circ</math> (kJ/mol)</b> | <b><math>\Delta S^\circ</math> (J/mol. K)</b> |
|------------------------|------------------------|---------------------------------------------|---------------------------------------------|-----------------------------------------------|
| <b>MB</b>              | 298                    | -6.386                                      |                                             |                                               |
|                        | 308                    | -7.172                                      |                                             |                                               |
|                        | 318                    | -7.959                                      | 17.046                                      | 78.631                                        |
|                        | 328                    | -8.745                                      |                                             |                                               |
| <b>Cu<sup>2+</sup></b> | 298                    | -2.222                                      |                                             |                                               |
|                        | 308                    | -2.741                                      |                                             |                                               |
|                        | 318                    | -3.260                                      | 13.234                                      | 51.868                                        |
|                        | 328                    | -3.778                                      |                                             |                                               |

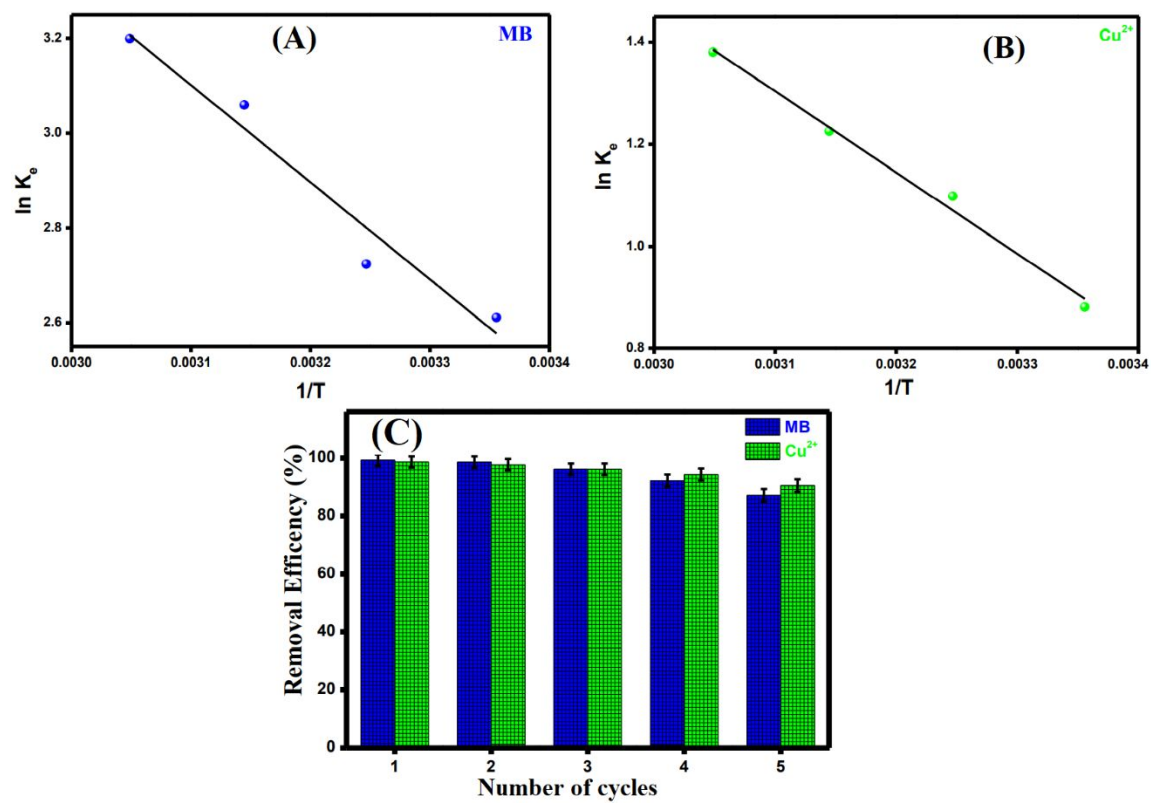

**Figure S1** Van't Hoff plots (A, B) and the reusability (C) for the adsorption of MB and  $\text{Cu}^{2+}$  onto UiO-66/GOCOOH@SA composite beads.
